# Supplementary material
Source: ML conference proceedings conference paper supplement (https://proceedings.neurips.cc/paper_files/paper/2022/hash/00358de35a101a372ea0412bed913c86-Abstract.html)
Supplement: Supplementary file 1 [file 00358de35a101a372ea0412bed913c86-Supplemental-Conference.zip]

Archive with 2 entries (2 files):
- [2022 NeurIPS] GOL_appendix.pdf
- [2022 NeurIPS] GOL_supp_video.mp4
